# Supplementary material
Source: PubMed Central journal article supplement (PMC2948476)
Supplement: supp_213_20_3515__1.pdf [file supp_213_20_3515__1.pdf]

Table S1. Sample sizes of aquatic and terrestrial locomotor cycles used for kinematic analyses

| Turtle | Aquatic cycles | Terrestrial cycles |
|--------|----------------|--------------------|
| TS02   | 16             | 17                 |
| TS09   | 20             | 20                 |
| TS11   | 20             | 18                 |
| TS14   | 20             | 16                 |
| TS31   | 20             | 26                 |
| TS36   | 20             | 4                  |
| TS99   | 20             | 22                 |
