# Supplementary material
Source: PubMed Central journal article supplement (PMC2948476)
Supplement: supp_213_20_3515__2.pdf [file supp_213_20_3515__2.pdf]

Table S2. Aquatic and terrestrial sample sizes for each turtle for EMG variables for statistics

| Variable                     | Turtles (aquatic cycles; terrestrial cycles)                              |
|------------------------------|---------------------------------------------------------------------------|
| Coracobrachialis             |                                                                           |
| All EMG timing variables     | TS09 (20; 0); TS11 (20; 0); TS14 (20; 0); TS31 (0; 24); TS36 (20; 4)      |
| Normalized amplitude         | TS36 (20; 4)                                                              |
| Pectoralis Burst 1*          |                                                                           |
| All EMG variables            | TS09 (20; 20); TS11 (18; 18); TS99 (2; 17)                                |
| Pectoralis Burst 2*          |                                                                           |
| All EMG variables            | TS02 (16; 17); TS09 (20; 20); TS11 (20; 18); TS31 (20; 26); TS99 (20; 17) |
| Latissimus dorsi 'Burst 1'   |                                                                           |
| All EMG variables            | TS11 (20; 18); TS31 (20; 24); TS36 (20; 4)                                |
| Latissimus dorsi 'Burst 2'   |                                                                           |
| All EMG variables            | TS11 (20; 17); TS31 (20; 21); TS36 (20; 4)                                |
| Deltoid 'Burst 1'            |                                                                           |
| All EMG variables            | TS09 (20; 20); TS11 (9; 5); TS14 (20; 5); TS31 (20; 26); TS99 (20; 21)    |
| Deltoid 'Burst 2'            |                                                                           |
| All EMG variables            | TS09 (7; 9); TS14 (14; 3); TS31 (1; 12); TS99 (20; 20)                    |
| Triceps Burst 1              |                                                                           |
| All EMG timing variables     | TS02 (16; 17); TS11 (20; 8); TS14 (20; 16); TS31 (20; 10); TS99 (20; 22)  |
| Normalized amplitude         | TS11 (20; 8); TS14 (20; 16); TS31 (5; 10); TS99 (20; 22)                  |
| Triceps Burst 2              |                                                                           |
| All EMG timing variables     | TS02 (16; 17); TS11 (11; 8); TS14 (10; 16); TS31 (15; 9); TS99 (20; 22)   |
| Normalized amplitude         | TS11 (11; 8); TS14 (10; 16); TS31 (4; 9); TS99 (20; 22)                   |
| Subscapularis (lat approach) |                                                                           |
| All EMG variables            | TS11 (20; 17)                                                             |
| Subscapularis (cor approach) |                                                                           |
| All EMG variables            | TS11 (20; 18); TS14 (20; 16)                                              |
| Supracoracoideus (ant head)  |                                                                           |
| All EMG variables            | TS14 (18; 12)                                                             |

All EMG timing variables are: onset; relative onset; offset; relative offset; and duration.

All EMG variables are: all EMG timing variables and normalized amplitude.

Burst 1 and Burst 2 are used to indicate early and late activity, respectively, of a muscle exhibiting continuous activity that spans the retraction to protraction phase shift. These muscles include the deltoid and latissimus dorsi.

\*Aquatic EMGs for the pectoralis showed early and late bursts of activity; but terrestrial EMGs showed only a single, late burst. Because the pectoralis burst common to both habitats was later in the limb cycle, it is coded as Burst 2 even if there was only a single burst. Because terrestrial EMGs only showed a single burst, statistical comparisons were run in two ways: aquatic Burst 1 vs terrestrial burst and aquatic Burst 2 vs terrestrial burst.
