# Supplementary material
Source: PubMed Central journal article supplement (PMC2948476)
Supplement: supp_213_20_3515__3.pdf [file supp_213_20_3515__3.pdf]

Table S3. Aquatic and terrestrial sample sizes for each turtle for each plotted EMG timing variable

| Variable                     | Turtles (aquatic cycles; terrestrial cycles)                                           |
|------------------------------|----------------------------------------------------------------------------------------|
| Coracobrachialis             | TS09 (20; 0); TS11 (20; 0); TS14 (20; 0); TS31 (0; 24); TS36 (20; 4)                   |
| Pectoralis Burst 1*          | TS02 (0; 17); TS09 (20; 20); TS11 (18; 18); TS31 (0; 26); TS99 (2; 17)                 |
| Pectoralis Burst 2*          | TS02 (16; 0); TS09 (20; 0); TS11 (20; 0); TS31 (20; 0); TS99 (20; 0)                   |
| Latissimus dorsi 'Burst 1'   | TS11 (20; 18); TS31 (20; 24); TS36 (20; 4)                                             |
| Latissimus dorsi 'Burst 2'   | TS11 (20; 17); TS31 (20; 21); TS36 (20; 4)                                             |
| Deltoid 'Burst 1'            | TS09 (20; 20); TS11 (9; 5); TS14 (20; 5); TS31 (20; 26); TS36 (20; 0); TS99 (20; 21)   |
| Deltoid 'Burst 2'            | TS09 (7; 9); TS14 (14; 3); TS31 (1; 12); TS99 (20; 20)                                 |
| Triceps Burst 1              | TS02 (16; 17); TS09 (0; 19); TS11 (20; 8); TS14 (20; 16); TS31 (20; 10); TS99 (20; 22) |
| Triceps Burst 2              | TS02 (16; 17); TS09 (0; 19); TS11 (11; 8); TS14 (10; 16); TS31 (15; 9); TS99 (20; 22)  |
| Subscapularis (lat approach) | TS11 (20; 17)                                                                          |
| Subscapularis (cor approach) | TS11 (20; 18); TS14 (20; 16)                                                           |
| Supracoracoideus (ant head)  | TS11 (3; 0); TS14 (18; 12)                                                             |
| Supracoracoideus (post head) | TS02 (16; 0)                                                                           |

'Cor approach' indicates that the electrode was implanted into the muscle by inserting it more posterior and laterally (as if approaching the coracobrachialis); 'lat approach' indicates that the electrode was implanted into the muscle by inserting it more anteriorly (as if approaching the latissimus dorsi); ant, anterior; post, posterior.

'Burst 1' and 'Burst 2' refer to the early and late bursts, respectively; bursts of activity seen in muscles that present as a single continuous burst of activity that spans the switch from retraction to protraction.

\*Aquatic EMGs for pectoralis showed a variable early burst that has been coded as Burst 1, with the 'typical' burst of activity being coded always as Burst 2, even if there is only a single burst. In this case, 1 and 2 refer to 'early' and 'late' activity. Terrestrial EMGs only showed a single burst of activity that was always coded above as Burst 1.
